# Supplementary material for: The chloride channel family gene CLCd negatively regulates pathogen-associated molecular pattern (PAMP)-triggered immunity in Arabidopsis
Source: PubMed Central journal article supplement (PMC3935575; doi:10.1093/jxb/ert484), 2014-01-21
Supplement: supp_ert484_jexbot107367_file001.pdf [file supp_ert484_jexbot107367_file001.pdf]

**Supplementary Table S1.** Sequences of the primers used in this work. Primers were used for semi-quantitative RT-PCR (RT), quantitative RT-PCR (qRT) and generating constructs (“Prom” for amplifying the native promoter from genomic DNA; “Cds” for amplifying CDS from cDNA)

| Name            | Sequence (5' to 3')        |
|-----------------|----------------------------|
| RT-ClCa-c1      | GGTTTCACACATCGAGAGTTTAG    |
| RT-ClCa-c2      | AATGTAGTAGCCGACGGCGAGAA    |
| RT-ClCb-c1      | CCAACATGTTTGGTGCTACTAC     |
| RT-ClCb-c2      | CTGACAGCATCATCGTTGGTG      |
| RT-ClCc-c1      | CTTGGAAGTGGCTCAGATTCTTC    |
| RT-ClCc-c2      | CTCCAGCAAGAATGACAGGAATG    |
| RT-CLCd-c1      | TGGAATTGATATCCCGGCACC      |
| RT-CLCd-c2      | ACCTAAAAGATCGTCTAGAAGC     |
| RT-CLCd-c3      | CTCCGATAACTCCTATTACAGC     |
| RT-ClCe-c1      | CCTTGATGATTCTCTCAACCAATC   |
| RT-ClCe-c2      | GATTGCTCAGCACCTTAAGTGAG    |
| RT-ClCa-d1      | GGAACACAACGCATAACGCATTC    |
| RT-ClCa-d2      | TCTAGCTTTTCCACTTTTGTG      |
| RT-ClCb-d1      | CTCCACGGGTGATCTTGAGAG      |
| RT-ClCb-d2      | GTATGCCCTTAGGTCCTGTCTG     |
| RT-ClCc-d1      | CAAAGCCCGTGACTTTGGTAAAG    |
| RT-ClCc-d2      | CACTTGAGGGGATCAATGTGAG     |
| RT-ClCd-d1      | GCTTCTAGACGATCTTTTAGGTTAA  |
| RT-ClCd-d2      | ATGGCGGTATGACCGATAAATTC    |
| RT-ClCe-d1      | GCTGCACCAGCCAATCATTTC      |
| RT-ClCe-d2      | GCTCATCAGAGGAAAGGAGTGAG    |
| RT-ClCf-F       | GCGTTGATGATCGAAATGAC GAG   |
| RT-ClCf-R       | AGTCTCTGTAGACGAAGCCATGC    |
| RT-ClCg-c1      | CAAACCTAACGACGGAGGAC       |
| RT-ClCg-c2      | CTGACCAAGTATAGATGCAACAC    |
| RT-ClCd-u1      | CGAATCATCTCCAGAACGGGATC    |
| RT-ClCd-u2      | GACCAAGCAACGATGCAATGCAG    |
| RT-FLS2 F       | ACTCTCCTCCAGGGGCTAAG       |
| RT-FLS2 R       | GGGATGGTTCCAGTCAACAAG      |
| RT-ACT7 F       | GGTGAGGATATTCAGCCACTTGTCTG |
| RT-ACT7 R       | TGTGAGATCCCGACCCGCAAGATC   |
| qRT-ClCd F      | CGGAGGTGTCAATAGTCTCG       |
| qRT-ClCd R      | GCAAATTTCCATCCAGCGAA       |
| qRT-FRK1 F      | ACGGGCATAGTTCCACAAAG       |
| qRT-FRK1 R      | CGTCAAAAGAACGACGATGA       |
| qRT-PR1 F       | GTTCTTCCCTCGAAAGCTCAAG     |
| qRT-PR1 R       | GTTACACCTCACTTTGGCACATC    |
| qRT-AT1G51890 F | CTAGCCGACTTTGGGCTATC       |
| qRT-AT1G51890 R | CCAGTTTGTCTGTGTAATACTCAGG  |
| qRT-AT2G17740 F | CATGCGTTGCTGAAGAAGAGG      |

|                 |                                        |
|-----------------|----------------------------------------|
| qRT-AT2G17740 R | TGCTCCATCTCTCTTTGTGCC                  |
| qRT-FLS2 F      | ACTCTCCTCCAGGGGCTAAG                   |
| qRT-FLS2 R      | GGGATGGTTCCAGTCAACAAG                  |
| qRT-ACT2 F      | AGTGTCTGGATCGGTGGTTC                   |
| qRT-ACT2 R      | CCCCAGCTTTTTAAGCCTTT                   |
| Cds-FLS2 F      | CGGGATCCATGGAAGTTGAGAGAGATCAACACATTTC  |
| Cds-FLS2 R      | CATGCCATGGTTGCAACACATTCTTGTACTTTCCATTG |
| Prom-ClCd F     | CGGAATTCGACTTTGTGGCTGAGAGTGAG          |
| Prom-ClCd R     | CGGGATCCGATCGAGAGTTCGATCTCTGG          |
| Cds-ClCd F      | CGCGGATCCATGTTATCGAATCATCTCCAGAACG     |
| Cds-ClCd R      | GTTGCGGCCGCTTAACCTAAAAGATCGTCTAGAAGCG  |

---

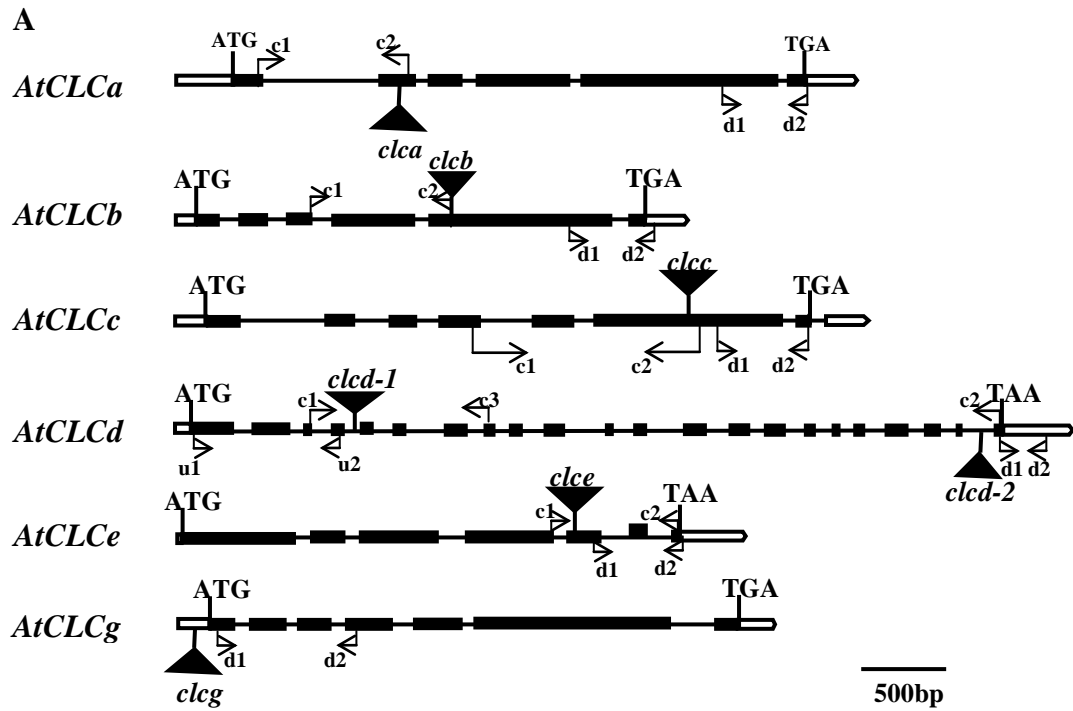

**B**

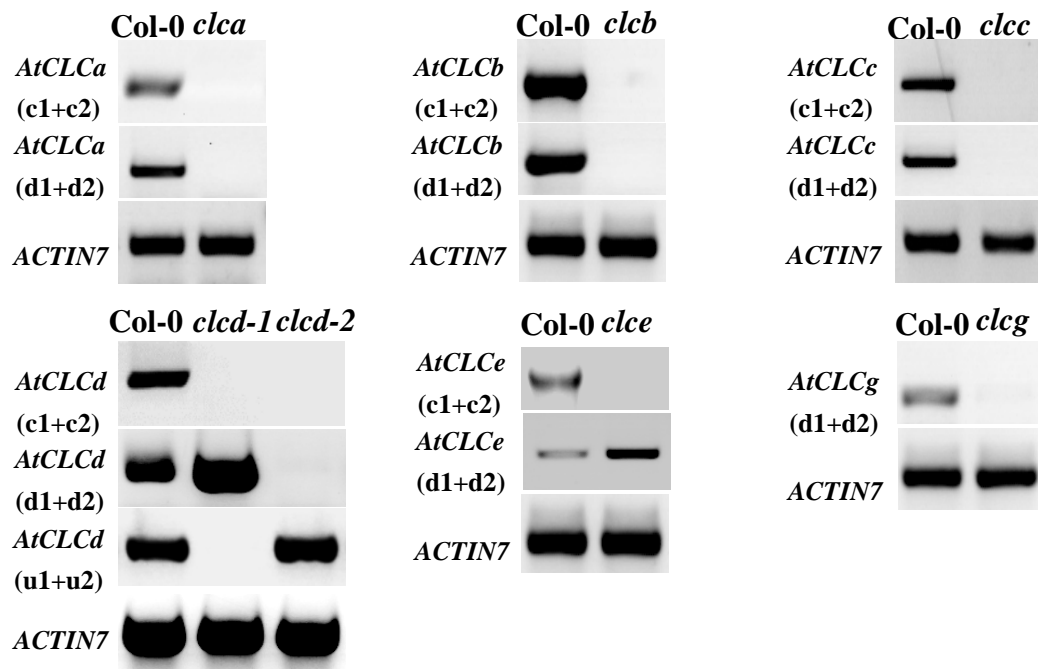

**Supplementary Figure S1. Characterization of *Arabidopsis* CLC T-DNA insertion lines.**

A. Schematic structure of *AtCLC* family genes, T-DNA insertion sites (black arrows) and positions of the primers used in the semi-quantitative RT-PCR analysis. Filled boxes, exons; open regions, untranslated regions; black lines, introns. B. Expression of *AtCLC* family genes determined by semi-quantitative RT-PCR in *clc* mutant leaves. The level of *ACTIN7* transcripts was used as a loading control.

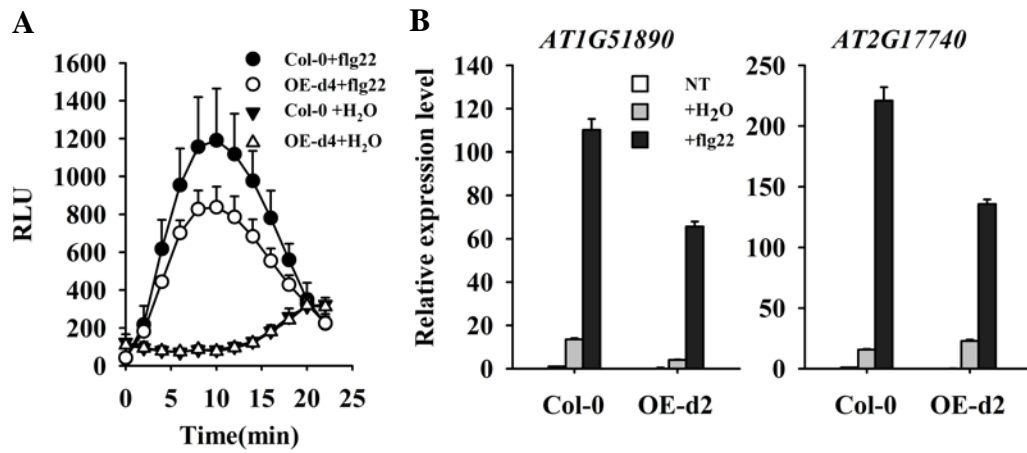

**Supplementary Figure S2. PAMP-triggered immunity is compromised in the *AtCLCd* overexpressing lines.** A. A reduced flg22-induced ROS burst was observed in an *AtCLCd*-overexpressing line (OE-d4). Values are mean  $\pm$  SD (n=8) measured in RLU (Relative Light Units). B. Quantitative RT-PCR analysis of PTI marker gene expression after infiltration of 1 $\mu$ M flg22 or water for 1 hour. RNA was extracted from 4-week-old Col-0 and OE-d2 leaves. Samples were measured in triplicate and normalized to *ACTIN2*. Error bars indicate  $\pm$  SD. NT, no treatment.

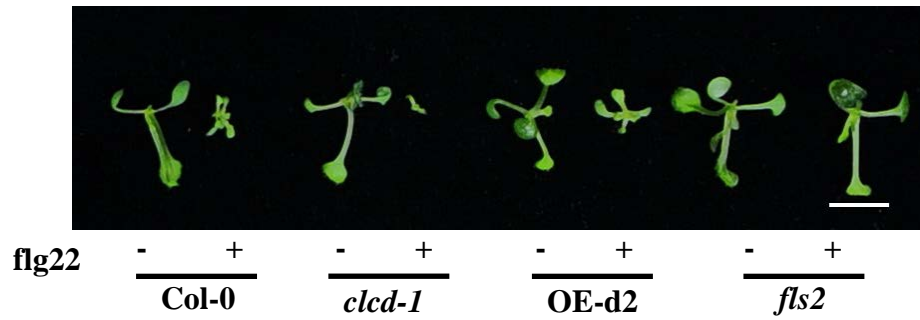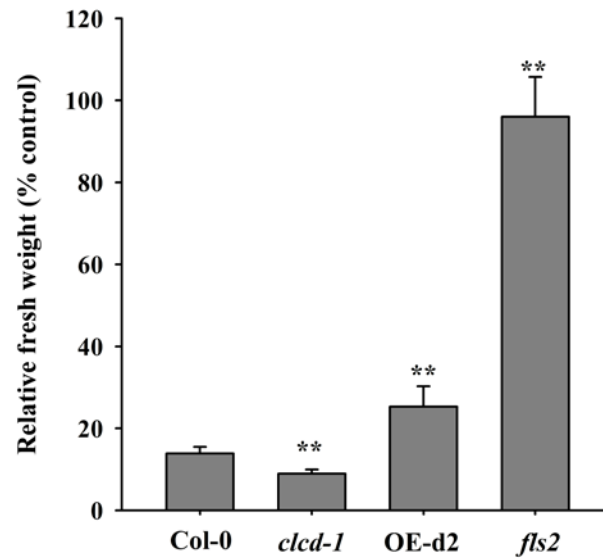

**Supplementary Figure S3. Shoot growth inhibition induced by flg22 in Col-0, *clcd* mutant and *AtCLCd*-overexpressing plants.** Five-day-old seedlings were treated or mock treated with 1μM flg22 for eight days. Representative pictures were taken and seedling fresh weights were measured. Results are means±SD (n=11-14). \*\* P<0.01 (*t*-test). Bar =1cm.

A

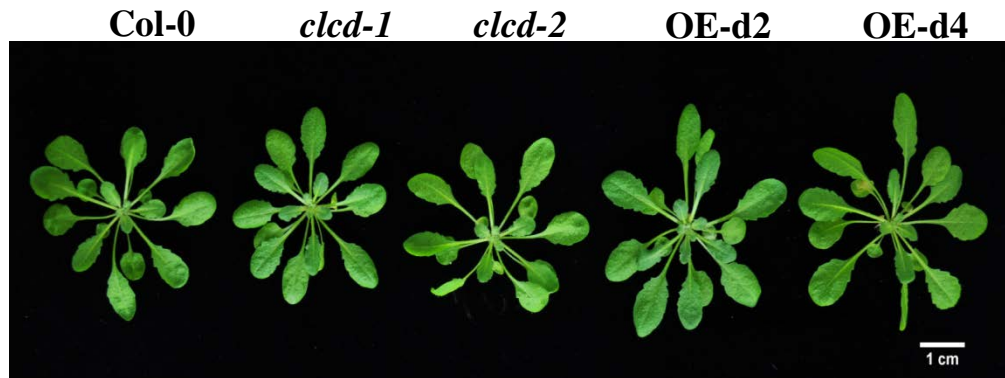

B

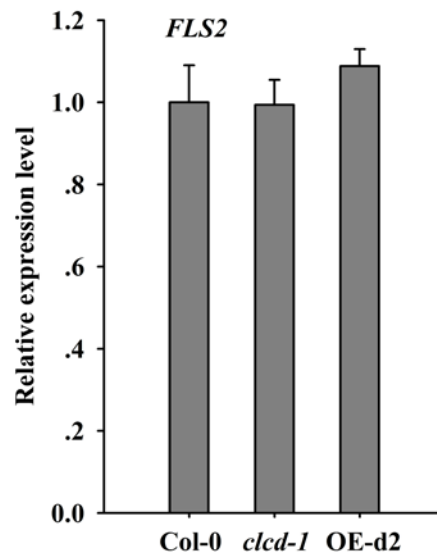

**Supplementary Figure S4. Morphological phenotypes and *FLS2* expression levels in the *AtCLCd*-misexpressing plants.** A. 5-week-old plants grown in soil under short-day conditions are shown. Bar =1cm. B. Expression levels of *AtCLCd* were determined by quantitative RT-PCR in the wild-type (Col-0), the *clcd* mutant and the *AtCLCd*-overexpressing lines. Samples were measured in triplicate and the data were normalized to *ACTIN2*. Error bars indicate SD.
